# Supplementary material for: Search for non-lactam inhibitors of mtb β-lactamase led to its open shape in apo state: new concept for antibiotic design
Source: PubMed Central journal article supplement (PMC5524718; doi:10.1038/s41598-017-06023-3), 2017-07-24

## **SUPPLEMENTARY INFORMATION**

### **SEARCH FOR NON-LACTAM INHIBITORS OF Mtb $\beta$ -LACTAMASE LED TO ITS OPEN SHAPE IN APO STATE: NEW CONCEPT FOR ANTIBIOTIC DESIGN**

AMIN SAGAR\*, NAZIA HALEEM, YAAWAR MIR BASHIR, AND ASHISH\*

CSIR-INSTITUTE OF MICROBIAL TECHNOLOGY, CHANDIGARH INDIA

## Supplementary Table S1

A table showing the compounds C1 through C32 which were purchased after virtual ligand screening and tested using the *In-vitro*  $\beta$ -lactamase activity assay. The 2D structures, IUPAC names and SMILES notations of the compounds have been tabulated with the rows colored according to the chemical moiety present in the compound. The color key is given at the bottom of the table.

| Molecule Name | Representation                                                                      | IUPAC Name                                                                                                              | SMILES                                                       |
|---------------|-------------------------------------------------------------------------------------|-------------------------------------------------------------------------------------------------------------------------|--------------------------------------------------------------|
| C1            | 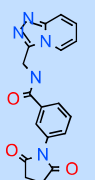    | 1-(3-(((1,7,8-triaza-bicyclo[4.3.0]nona-2,4,6,8-tetraen-9-yl)-methylamino)-formyl)-phenyl)-pyrrolidine-2,5-dione        | <chem>C1CC(N(C1=O)c1cccc(c1)C(NCc1nnc2ccccc12)=O)=O</chem>   |
| C2            |    | 2-(2-(5-cyclopropylamino-1,3,4-thiadiazol-2-ylsulfanyl)-acetylamino)-1-methylamino-ethanone                             | <chem>CNC(CNC(CSc1nnc(NC2CC2)s1)=O)=O</chem>                 |
| C3            |    | 2-((thiophen-2-yl)-formylamino)-1-((1,7,8-triaza-bicyclo[4.3.0]nona-2,4,6,8-tetraen-9-yl)-methylamino)-ethanone         | <chem>C(C(NCc1nnc2ccccc12)=O)NC(c1cccs1)=O</chem>            |
| C4            |    | 2-(5-(3-fluoro-phenyl)-2H-1,2,3,4-tetraazol-2-yl)-1-((furan-2-yl)-methylamino)-ethanone                                 | <chem>C(c1ccco1)NC(Cn1nc(c2cccc(c2)F)nn1)=O</chem>           |
| C5            |   | 1-(4-(pyridin-3-yl)-thiazol-2-ylamino)-2-(7,8,9-triaza-bicyclo[4.3.0]nona-1(6),2,4,8-tetraen-7-yl)-ethanone             | <chem>C(C(Nc1nc(cs1)c1ccnc1)=O)n1c2ccccc2nn1</chem>          |
| C6            |  | (2-hydroxy-4-methoxy-phenyl)-((1,7,8-triaza-bicyclo[4.3.0]nona-2,4,6,8-tetraen-9-yl)-methylamino)-methanone             | <chem>COC1ccc(C(NCc2nnc3ccccc23)=O)c(c1)O</chem>             |
| C7            |  | 1-(4-fluoro-phenylamino)-2-(2-(1-(3-fluoro-phenyl)-1H-1,2,3,4-tetraazol-5-ylsulfanyl)-acetylamino)-ethanone             | <chem>C(C(Nc1ccc(cc1)F)=O)NC(CSc1nnnn1c1cccc(c1)F)=O</chem>  |
| C8            |  | 1-(3-((3-(1H-1,2,3,4-tetraazol-1-yl)-phenyl)-formylamino)-phenyl)-pyrrolidin-2-one                                      | <chem>C1CC(N(C1)c1cccc(c1)NC(c1cccc(c1)n1cnn1)=O)=O</chem>   |
| C9            |  | 2-(2-(4-cyclopropyl-5-(thiophen-2-yl)-4H-1,2,4-triazol-3-ylsulfanyl)-acetylamino)-1-(2,3-dimethyl-phenylamino)-ethanone | <chem>Cc1cccc(c1)NC(CNC(CSc1nnc(c2cccs2)n1C1CC1)=O)=O</chem> |

| Molecule Name | Representation | IUPAC Name                                                                                                                          | SMILES                                                                |
|---------------|----------------|-------------------------------------------------------------------------------------------------------------------------------------|-----------------------------------------------------------------------|
| C10           |                | 1-(3,4-difluoro-phenylamino)-2-(2-(4-p-tolyl-5-(pyrrolidin-1-yl)-4H-1,2,4-triazol-3-ylsulfanyl)-acetylamino)-ethanone               | <chem>Cc1ccc(cc1)n1c(nnc1SCC(NCC(Nc1ccc(c(c1)F)F)=O)=O)N1CCCC1</chem> |
| C11           |                | 1-(2-(2-methoxy-phenoxy)-ethylamino)-2-(1-phenyl-1H-1,2,3,4-tetraazol-5-ylsulfanyl)-ethanone                                        | <chem>COc1ccccc1OCCNC(CSc1nnnn1c1ccccc1)=O</chem>                     |
| C12           |                | 1-cyclohexylamino-2-((1-(1,7,8-triazabicyclo[4.3.0]nona-2,4,6,8-tetraen-9-yl)-ethylamino)-formylamino)-ethanone                     | <chem>CC(c1nnc2ccccc12)NC(NCC(NC1CCCCC1)=O)=O</chem>                  |
| C13           |                | 8-butyl-3-((5-(pyridin-2-yl)-4H-1,2,4-triazol-3-ylamino)-formyl)-8-aza-bicyclo[4.3.0]nona-1(6),2,4)[nH]1=O)-2-one                   | <chem>CCCCN1C(c2ccc(cc2C1=O)C(Nc1nnc(c2ccccc2)trien-7,9-dione</chem>  |
| C14           |                | 1-(4-((4-(4-methyl-piperidin-1-yl)-phenylamino)-formyl)-phenylamino)-2-(4-methyl-4H-1,2,4-triazol-3-ylsulfanyl)-ethanone            | <chem>CC1CCN(CC1)c1ccc(cc1)NC(c1ccc(cc1)NC(CSc1nnc1C)=O)=O</chem>     |
| C15           |                | 8,9-dihydroxy-3-oxo-5-((1-phenyl-1H-1,2,3,4-tetraazol-5-ylsulfanyl)-methyl)-2-oxa-bicydo[4.4.0]deca-1(10),4,6,8-tetraene            | <chem>C(C1=CC(=O)Oc2cc(c(cc12)O)O)Sc1nnnn1c1ccccc1</chem>             |
| C16           |                | 1-(3-((5-(5-bromo-thiophen-2-yl)-1,3,4-oxadiazol-2-yl)-methoxy)-phenyl)-1H-1,2,3,4-tetraazole                                       | <chem>Cc1nnc(c2ccc(s2)[Br])o1)Oc1ccccc1)n1cnnn1</chem>                |
| C17           |                | ((2,4-dimethyl-1,5,7,8-tetraaza-bicydo[4.3.0]nona-2,4,6,8-tetraen-9-yl)-methylamino)-(4-(pyrrolidin-1-ylsulfonyl)-phenyl)-methanone | <chem>Cc1cc(C)n2c(CNC(c3ccc(cc3)S(N3CCCC3)(=O)=O)=O)nnc2n1</chem>     |
| C18           |                | 2-(5-(3-bromo-phenylamino)-1,3,4-thiadiazol-2-ylsulfanyl)-1-(4-methoxy-phenylamino)-propan-1-one                                    | <chem>CC(C(Nc1ccc(cc1)OC)=O)Sc1nnc(Nc2ccccc2)[Br]s1</chem>            |

| Molecule Name | Representation                                                                      | IUPAC Name                                                                                                                                  | SMILES                                                             |
|---------------|-------------------------------------------------------------------------------------|---------------------------------------------------------------------------------------------------------------------------------------------|--------------------------------------------------------------------|
| C19           | 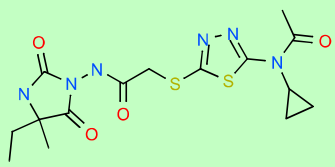    | 3-(2-(5-(acetyl-cyclopropyl-amino)-1,3,4-thiadiazol-2-ylsulfanyl)-acetylamino)-5-ethyl-5-methyl-imidazolidine-2,4-dione                     | <chem>CCC1(C)C(N(C(N1)=O)NC(CSc1nnc(N(C2CC2)C(C)=O)s1)=O)=O</chem> |
| C20           |    | 3-benzyl-8-((5-isopropyl-1,3,4-thiadiazol-2-ylamino)-formyl)-7-methyl-9-thia-2,4-diazabicydo[4.3.0]nona-1(6),2,7-trien-5-one                | <chem>CC(C)c1nnc(NC(c2c(C)c3C(NC(Cc4ccccc4)=Nc3s2)=O)=O)s1</chem>  |
| C21           |    | 2-oxo-2-(2,2,2-trifluoro-ethylamino)-ethyl 3-(furan-2-yl)-2-(5-phenyl-1H-1,2,3,4-tetraazol-1-yl)-prop-2-enoate                              | <chem>C(C(F)(F)F)NC(COC(C(=C)Cc1ccco1)n1c(c2ccccc2)nnn1)=O</chem>  |
| C22           |    | 2-(4-amino-5-((3,5-dimethyl-phenoxy)-methyl)-4H-1,2,4-triazol-3-ylsulfanyl)-1-(methyl-phenyl-amino)-ethanone                                | <chem>Cc1cc(C)cc(c1)OCc1nnc(n1N)SCC(N(C)c1ccccc1)=O</chem>         |
| C23           |   | 1-(2,3-dimethyl-phenylamino)-2-(2-(5-(4-fluoro-phenylamino)-1,3,4-thiadiazol-2-ylsulfanyl)-acetylamino)-ethanone                            | <chem>Cc1cccc(c1C)NC(CNC(CSc1nnc(Nc2ccc(cc2)F)s1)=O)=O</chem>      |
| C24           |  | 4-(((1-(2-methoxy-phenyl)-1H-1,2,3,4-tetraazol-5-ylsulfanyl)-methyl)-phenyl)-phenylamino-methanone                                          | <chem>COc1ccccc1n1c(nnn1)SCc1ccc(cc1)C(Nc1ccccc1)=O</chem>         |
| C25           |  | 1-(2,3-dimethyl-phenylamino)-2-(2-(4-(2-fluoro-phenyl)-4H-1,2,4-triazol-3-ylsulfanyl)-acetylamino)-ethanone                                 | <chem>Cc1cccc(c1C)NC(CNC(CSc1nnc1c1ccccc1F)=O)=O</chem>            |
| C26           |  | ethyl 6-((1-cyclohexyl-1H-1,2,3,4-tetraazol-5-ylsulfanyl)-methyl)-4-(5-methyl-furan-2-yl)-2-oxo-1,2,3,4-tetrahydro-pyrimidine-5-carboxylate | <chem>CCOC(C1C(c2ccc(C)o2)NC(NC=1CSc1nnnn1C1CCCC1)=O)=O</chem>     |
| C27           |  | 4-(2-(5-(3-methoxy-phenylamino)-1,3,4-thiadiazol-2-ylsulfanyl)-propionylamino)-benzenesulfonamide                                           | <chem>CC(C(Nc1ccc(cc1)S(N)(=O)=O)=O)Sc1nnc(Nc2ccccc2)OCs1</chem>   |

| Molecule Name | Representation                                                                     | IUPAC Name                                                                                                                | SMILES                                                               |
|---------------|------------------------------------------------------------------------------------|---------------------------------------------------------------------------------------------------------------------------|----------------------------------------------------------------------|
| C28<br>28     | 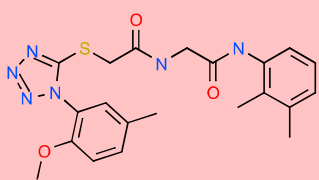   | 1-(2,3-dimethyl-phenylamino)-2-(2-(1-(2-methoxy-5-methyl-phenyl)-1H-1,2,3,4-tetraazol-5-ylsulfanyl)-acetylamino)-ethanone | <chem>Cc1ccc(c(c1)n1c(nnn1)SCC(NCC(Nc1cccc(C)c1C)=O)=O)OC</chem>     |
| C29<br>29     |   | 2-(1-(2,4-dimethyl-phenyl)-1H-1,2,3,4-tetraazol-5-ylsulfanyl)-1-(4-(phenyl-methoxy)-phenylamino)-ethanone                 | <chem>Cc1ccc(c(c1)n1c(nnn1)SCC(Nc1ccc(cc1)OCc1ccccc1)=O)OC</chem>    |
| C30<br>30     |   | 2-(3-isopropyl-isoxazol-5-ylamino)-2-oxo-ethyl 2-(1-(2,5-dimethyl-phenyl)-1H-1,2,3,4-tetraazol-5-ylsulfanyl)-ethanoate    | <chem>CC(C)c1cc(NC(COC(CSc2nnnn2c2cc(C)ccc2C)=O)=O)on1</chem>        |
| C31<br>31     |   | 1-(4-((4-ethoxy-phenylamino)-formyl)-phenylamino)-2-(1-(4-hydroxy-phenyl)-1H-1,2,3,4-tetraazol-5-ylsulfanyl)-ethanone     | <chem>CCOc1ccc(cc1)NC(c1ccc(cc1)NC(CSc1nnnn1c1ccc(cc1)O)=O)=O</chem> |
| C32<br>32     |  | 1-((furan-2-yl)-methylamino)-2-(5-otolyl-2H-1,2,3,4-tetraazol-2-yl)-ethanone                                              | <chem>Cc1ccccc1c1nnn(CC(NCc2ccco2)=O)n1</chem>                       |

|  |                                                                                    |
|--|------------------------------------------------------------------------------------|
|  | Compounds having Tetrazole moiety                                                  |
|  | Compounds having 1,3,4 - Triazole moiety independently or as part of a larger ring |
|  | Compounds having Thiadiazole moiety independently or as part of a larger ring      |
|  | Compounds having 1,2,3 - Triazole moiety independently or as part of a larger ring |

## Data-collection and scattering-derived parameters

Supplementary Table 2

|                                                            |                       |
|------------------------------------------------------------|-----------------------|
| <b>Data-collection parameters</b>                          |                       |
| Instrument /                                               | SAXSpace (Anton Paar) |
| Beam geometry                                              | 10 mm slit            |
| Wavelength (Å)                                             | 1.5418                |
| Desmearing Software                                        | Done using SAXSquant  |
| $q$ range (nm <sup>-1</sup> )                              | 0.10–3.00             |
| Temperature (K)                                            | 283                   |
| <b>Molecular-mass determination†</b>                       |                       |
| Partial specific volume (cm <sup>3</sup> g <sup>-1</sup> ) | 0.724                 |
| Calculated monomeric $M_r$ from sequence                   | 27.5                  |
| Dry volume calculated from sequence (Å <sup>3</sup> )      | 34190                 |
| <b>Software employed</b>                                   |                       |
| Primary data reduction                                     | <i>SAXSquant</i>      |
| Data processing                                            | <i>PRIMUS QT</i>      |
| <i>Ab initio</i> analysis                                  | <i>GASBOR</i>         |
| Validation and averaging                                   | <i>DAMAVER</i>        |
| Rigid-body modeling                                        | N/A                   |
| Computation of model intensities                           | <i>CRYSOL</i>         |
| Three-dimensional graphics representations                 | <i>PyMOL</i>          |

**Table 2A**

|                                                      | <b>Apo BlaC<br/>(Conc. Series)</b> | <b>Apo BlaC<br/>(Conc. Series)</b> | <b>Apo BlaC<br/>(Conc. Series)</b> |
|------------------------------------------------------|------------------------------------|------------------------------------|------------------------------------|
| <b>Data-collection parameters</b>                    |                                    |                                    |                                    |
| Exposure time (min)                                  | 30                                 | 30                                 | 30                                 |
| Concentration range (mg ml <sup>-1</sup> )           | 20                                 | 8                                  | 4                                  |
| I(0)/C                                               | 886.1                              | 880.0                              | 888.3                              |
| <b>Structural parameters†</b>                        |                                    |                                    |                                    |
| I(0) (Arbitrary Units) [from P(r)]                   | 17820± 201                         | 70±132                             | 3485±104                           |
| R <sub>g</sub> (nm) [from P(r)]                      | 2.27± 0.04                         | 2.30 ± 0.09                        | 2.45 ± 0.16                        |
| I(0) (Arbitrary Units) (from Guinier)                | 17722± 284                         | 7040±147                           | 3553±110                           |
| R <sub>g</sub> (nm) (from Guinier)                   | 2.35 ± 0.012                       | 2.38 ± 0.018                       | 2.30 ± 0.025                       |
| D <sub>max</sub> (nm)                                | 6.7                                | 6.8                                | 6.9                                |
| Porod volume estimate (Å <sup>3</sup> )              | 38503                              | 38258                              | 38365                              |
| <b>Molecular-mass determination</b>                  |                                    |                                    |                                    |
| Molecular mass M <sub>r</sub> [from V <sub>c</sub> ] | 29.1                               | 29.3                               | 29.4                               |



**Table 2B**

|                                                                  | <b>Apo BlaC<br/>(Time Series)</b>                                                                                                            | <b>BlaC+ CA<br/>(Time Series)</b>                                                                                                            | <b>BlaC+ SB<br/>(Time Series)</b>                                                                                                            | <b>BlaC+ TB<br/>(Time Series)</b>                                                                                                            | <b>BlaC+ C5<br/>(Time Series)</b>                                                                                                            | <b>BlaC+ C13<br/>(Time Series)</b>                                                                                                           | <b>BlaC+ C16<br/>(Time Series)</b>                                                                                                           | <b>BlaC+ C28<br/>(Time Series)</b>                                                                                                           |
|------------------------------------------------------------------|----------------------------------------------------------------------------------------------------------------------------------------------|----------------------------------------------------------------------------------------------------------------------------------------------|----------------------------------------------------------------------------------------------------------------------------------------------|----------------------------------------------------------------------------------------------------------------------------------------------|----------------------------------------------------------------------------------------------------------------------------------------------|----------------------------------------------------------------------------------------------------------------------------------------------|----------------------------------------------------------------------------------------------------------------------------------------------|----------------------------------------------------------------------------------------------------------------------------------------------|
| <b>Data-collection parameters</b>                                |                                                                                                                                              |                                                                                                                                              |                                                                                                                                              |                                                                                                                                              |                                                                                                                                              |                                                                                                                                              |                                                                                                                                              |                                                                                                                                              |
| Exposure time (min)                                              | 5                                                                                                                                            | 5                                                                                                                                            | 5                                                                                                                                            | 5                                                                                                                                            | 5                                                                                                                                            | 5                                                                                                                                            | 5                                                                                                                                            | 5                                                                                                                                            |
| Concentration range (mg ml <sup>-1</sup> )                       | 20                                                                                                                                           | 20                                                                                                                                           | 20                                                                                                                                           | 20                                                                                                                                           | 20                                                                                                                                           | 20                                                                                                                                           | 20                                                                                                                                           | 20                                                                                                                                           |
| <b>Structural parameters†</b>                                    |                                                                                                                                              |                                                                                                                                              |                                                                                                                                              |                                                                                                                                              |                                                                                                                                              |                                                                                                                                              |                                                                                                                                              |                                                                                                                                              |
| <i>I</i> ( <i>θ</i> )<br>(from Guinier)                          | 2968.24±135.43<br>2940.64±134.78<br>2911.41±139.99<br>2965.41±158.33<br>2934.97±136.12<br>2996.96±150.07<br>2966.75±161.12<br>2980.64±149.24 | 2958.99±151.07<br>2921.74±145.66<br>2969.78±150.96<br>2912.41±146.74<br>2955.25±145.32<br>2895.58±142.13<br>2958.35±148.42<br>2916.95±139.67 | 2914.08±142.78<br>2928.80±145.20<br>2953.57±150.79<br>2926.70±146.45<br>2937.87±150.68<br>2916.62±143.17<br>2941.73±151.52<br>2914.19±144.59 | 2940.78±143.75<br>2915.13±146.55<br>2996.80±147.41<br>2986.03±152.93<br>2980.35±149.17<br>2949.37±144.91<br>3024.01±156.85<br>2986.82±147.19 | 2932.99±145.29<br>2895.24±144.48<br>2954.58±146.53<br>2955.09±151.13<br>2930.92±143.42<br>2939.73±144.05<br>2973.23±146.34<br>2916.58±143.18 | 2951.25±150.28<br>2917.09±147.83<br>2997.49±146.42<br>2964.95±152.73<br>2926.70±147.20<br>2967.04±151.36<br>2931.05±145.34<br>2956.11±148.36 | 2940.90±147.00<br>2934.89±150.07<br>2956.45±154.29<br>2939.49±152.14<br>2951.54±146.20<br>2953.19±151.78<br>2969.84±147.45<br>2973.35±148.37 | 2908.22±145.29<br>2950.68±151.43<br>2962.11±146.44<br>3010.84±147.61<br>2922.80±149.83<br>2909.93±141.36<br>2975.66±143.54<br>2985.02±150.76 |
| <i>R<sub>g</sub></i> (nm)<br>(from Guinier)                      | 2.35±0.048<br>2.32±0.053<br>2.33±0.058<br>2.31±0.047<br>2.34±0.060<br>2.32±0.042<br>2.36±0.031<br>2.34±0.040                                 | 2.01±0.041<br>1.98±0.048<br>1.97±0.05<br>2.01±0.038<br>2.04±0.042<br>2.03±0.036<br>2.04±0.033<br>2.04±0.04                                   | 1.97±0.035<br>2.04±0.031<br>2.15±0.039<br>2.28±0.041<br>2.34±0.042<br>2.36±0.034<br>2.32±0.036<br>2.34±0.041                                 | 1.98±0.029<br>2.09±0.038<br>2.13±0.044<br>2.16±0.031<br>2.34±0.027<br>2.32±0.033<br>2.31±0.028<br>2.30±0.030                                 | 1.98 ± 0.03<br>2.02 ± 0.039<br>2.04 ± 0.06<br>2.10 ± 0.046<br>2.05 ± 0.051<br>2.12 ± 0.041<br>2.13 ± 0.039<br>2.09 ± 0.034                   | 2.04 ± 0.033<br>1.94 ± 0.047<br>2.09 ± 0.029<br>2.08 ± 0.066<br>2.05 ± 0.054<br>2.09 ± 0.032<br>2.11 ± 0.040<br>2.04 ± 0.038                 | 1.98 ± 0.048<br>1.95 ± 0.041<br>2.06 ± 0.039<br>2.04 ± 0.052<br>2.10 ± 0.032<br>2.12 ± 0.037<br>2.07 ± 0.044<br>2.09 ± 0.030                 | 2.11 ± 0.054<br>2.06 ± 0.032<br>2.13 ± 0.047<br>2.09 ± 0.039<br>2.13 ± 0.042<br>2.14 ± 0.034<br>2.08 ± 0.043<br>2.09 ± 0.033                 |
| Porod volume estimate (Å <sup>3</sup> )                          | 38091<br>37667<br>38358<br>39073<br>38012<br>38937<br>39154<br>38460                                                                         | 37840<br>39001<br>38137<br>38387<br>38346<br>37441<br>38540<br>38639                                                                         | 38912<br>38448<br>38827<br>38650<br>38182<br>38156<br>38568<br>37693                                                                         | 38119<br>38340<br>38912<br>38518<br>39001<br>38153<br>39085<br>38356                                                                         | 37947<br>38606<br>38189<br>38973<br>38523<br>38171<br>39235<br>38225                                                                         | 38325<br>38466<br>38346<br>38946<br>38093<br>38117<br>38199<br>38156                                                                         | 38429<br>39052<br>39079<br>39010<br>38485<br>38951<br>38620<br>38577                                                                         | 38925<br>38645<br>38320<br>39254<br>38454<br>38985<br>38092<br>38463                                                                         |
| <b>Molecular-mass determination</b>                              |                                                                                                                                              |                                                                                                                                              |                                                                                                                                              |                                                                                                                                              |                                                                                                                                              |                                                                                                                                              |                                                                                                                                              |                                                                                                                                              |
| Molecular mass <i>M<sub>r</sub></i> [from <i>V<sub>c</sub></i> ] | 28.9<br>28.8<br>29.5<br>28.7<br>28.6<br>29.2                                                                                                 | 29.2<br>28.7<br>29.1<br>29.0<br>28.9<br>29.0                                                                                                 | 29.2<br>29.4<br>29.4<br>28.8<br>29.9<br>29.2                                                                                                 | 29.0<br>29.1<br>28.9<br>28.9<br>29.5<br>28.9                                                                                                 | 29.3<br>29.1<br>29.0<br>28.6<br>28.8<br>29.5                                                                                                 | 29.3<br>28.9<br>29.3<br>29.2<br>28.9<br>29.4                                                                                                 | 29.1<br>28.6<br>29.3<br>29.0<br>28.5<br>28.8                                                                                                 | 29.1<br>28.9<br>28.8<br>28.9<br>29.2<br>28.7                                                                                                 |

## Supplementary Figure Legends

**Figure S1** - The SAXS intensity profiles of BlaC in Apo state (A) and in presence of 100 fold molar excess of Clavulanic acid (B), Sulbactam (C), Tazobactam (D), C5 (E), C13 (F), C16 (G) and C28 (H) at various time points from 5 to 40 min.

**Figure S2** - The Guinier Plots of BlaC in Apo state (A) and in presence of 100 fold molar excess of Clavulanic acid (B), Sulbactam (C), Tazobactam (D), C5 (E), C13 (F), C16 (G) and C28 (H) at various time points from 5 to 40 min. In the inset of each plot, the linear fits of the Guinier Plots at 5 and 40 min are presented close to each other to clearly show the difference in the slopes.

**Figure S3** - The Porod-Debye Plots of BlaC in Apo state (A) and in presence of 100 fold molar excess of Clavulanic acid (B), Sulbactam (C), Tazobactam (D), C5 (E), C13 (F), C16 (G) and C28 (H) at various time points from 5 to 40 min. The gray histograms represent the value of Porod Exponent calculated from the SAXS profile.

**Figure S4** - The Normalized Kratky Plots of BlaC in Apo state (A) and in presence of 100 fold molar excess of Clavulanic acid (B), Sulbactam (C), Tazobactam (D), C5 (E), C13 (F), C16 (G) and C28 (H) at various time points from 5 to 40 min.

Supplementary figure S1

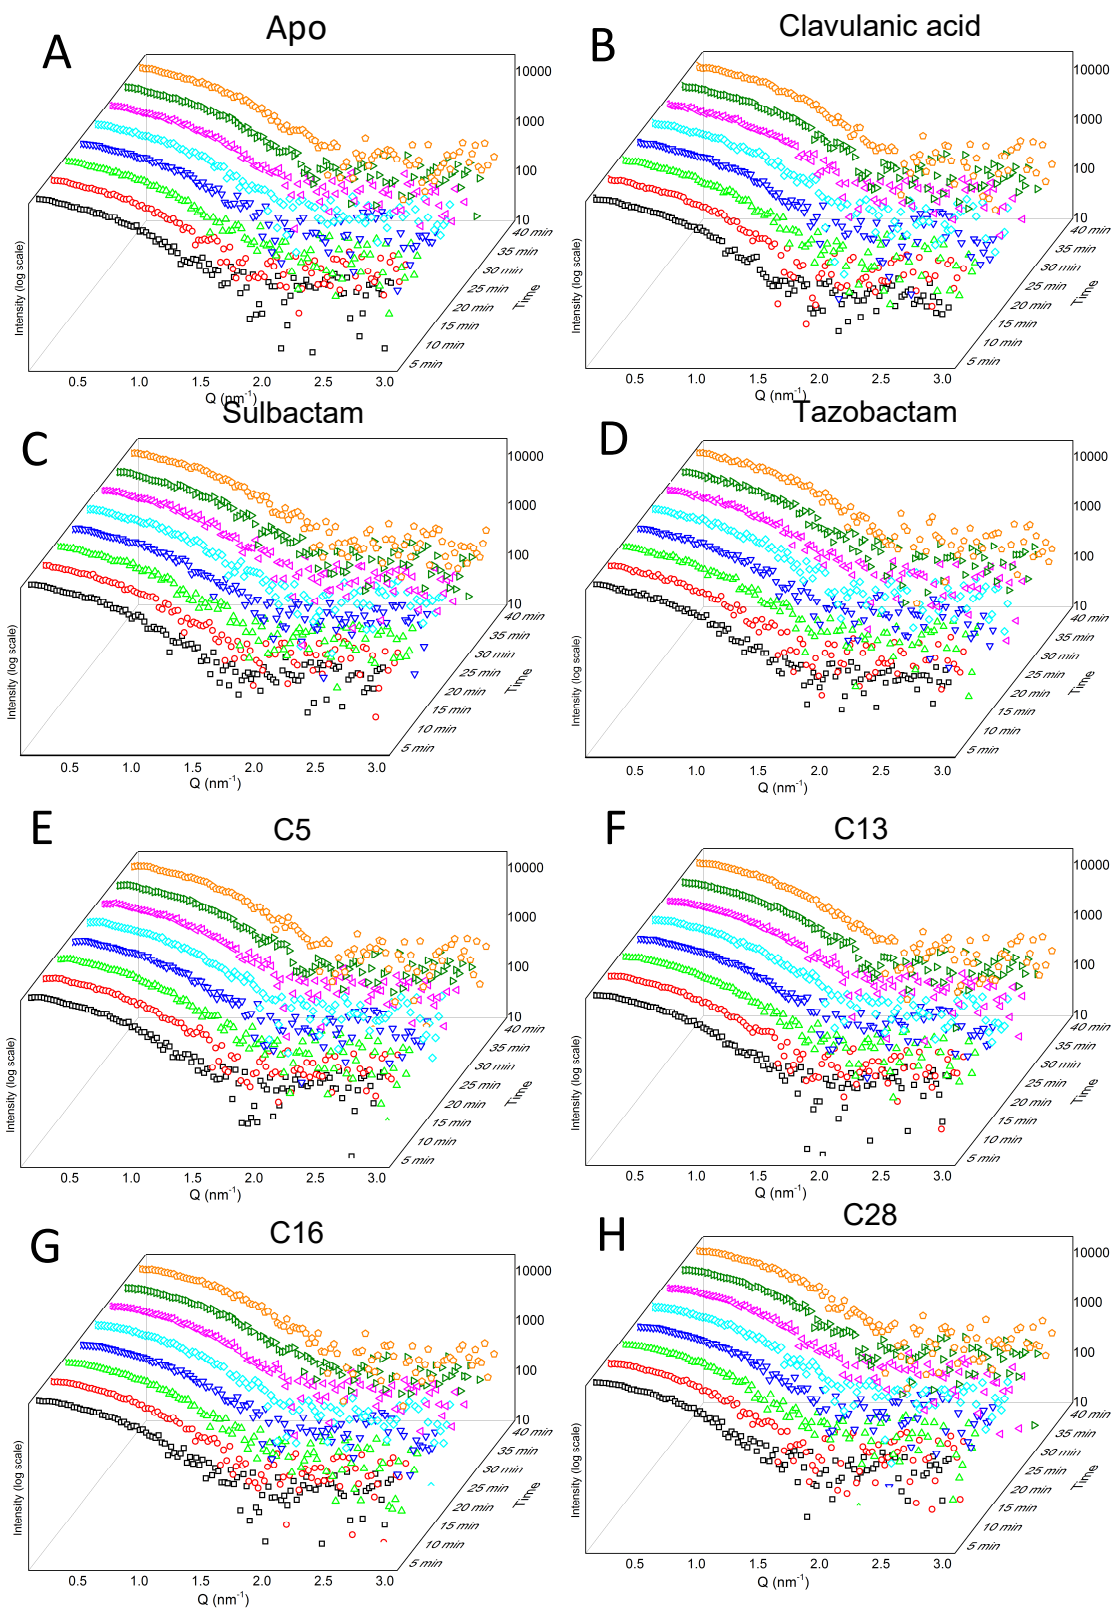

Supplementary figure S2

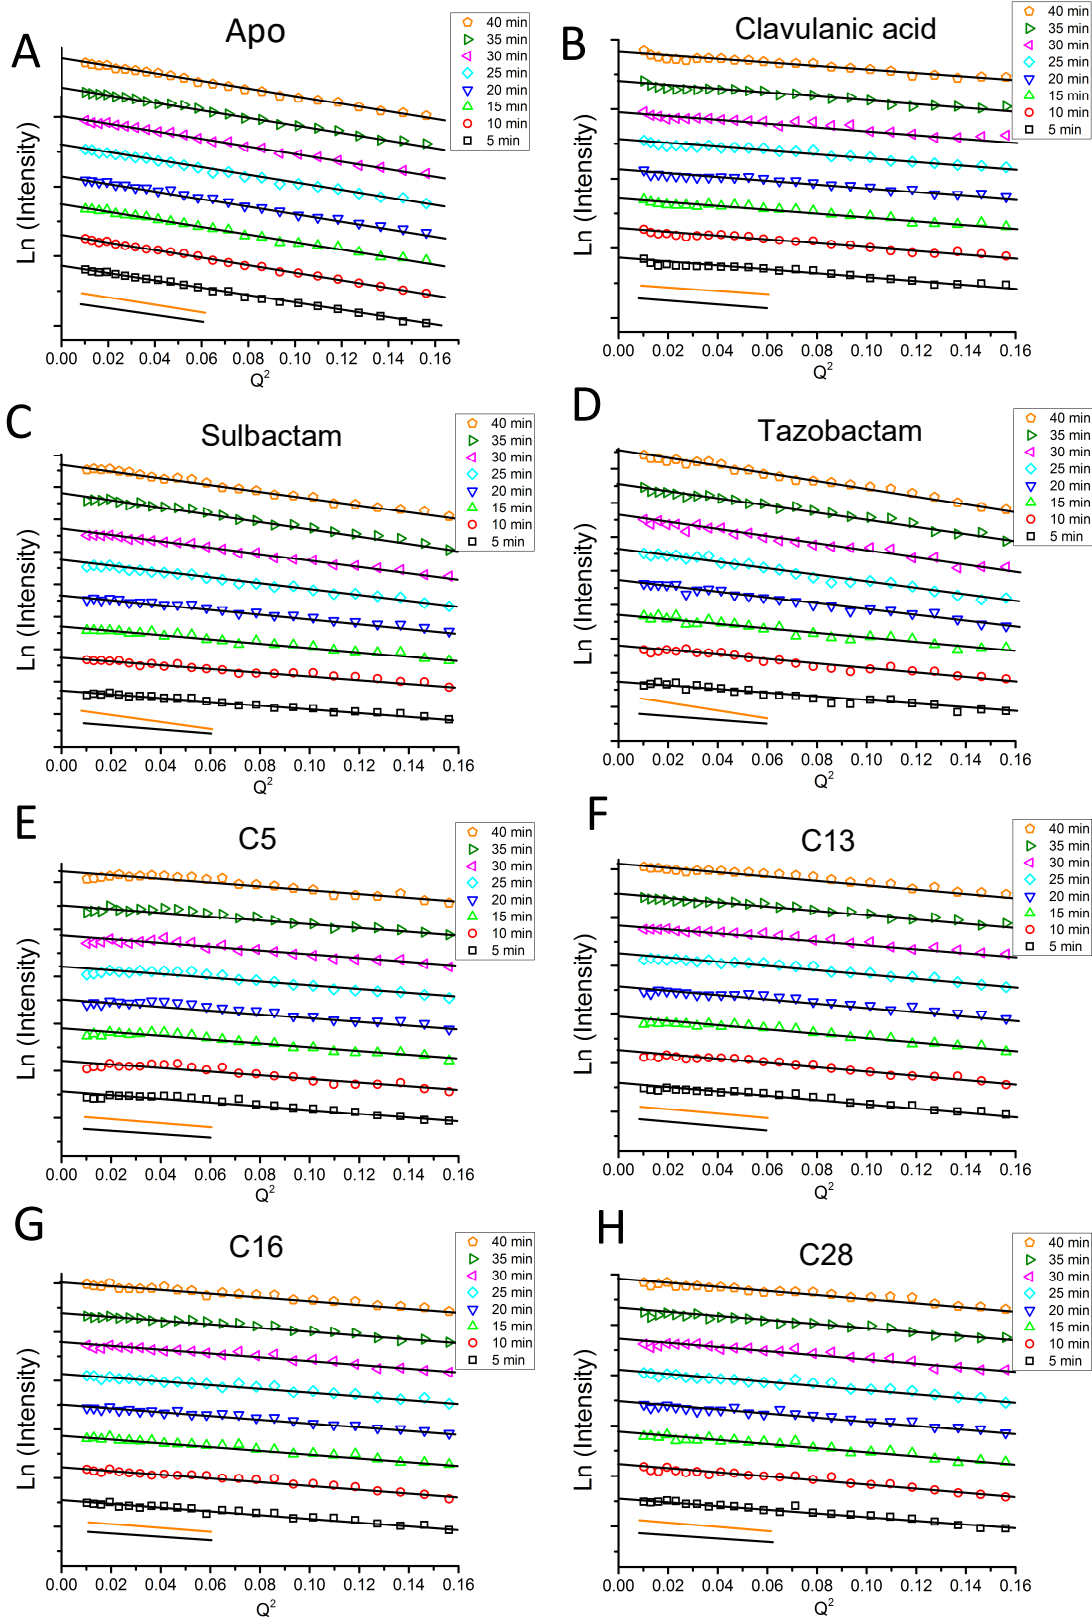

Supplementary figure S3

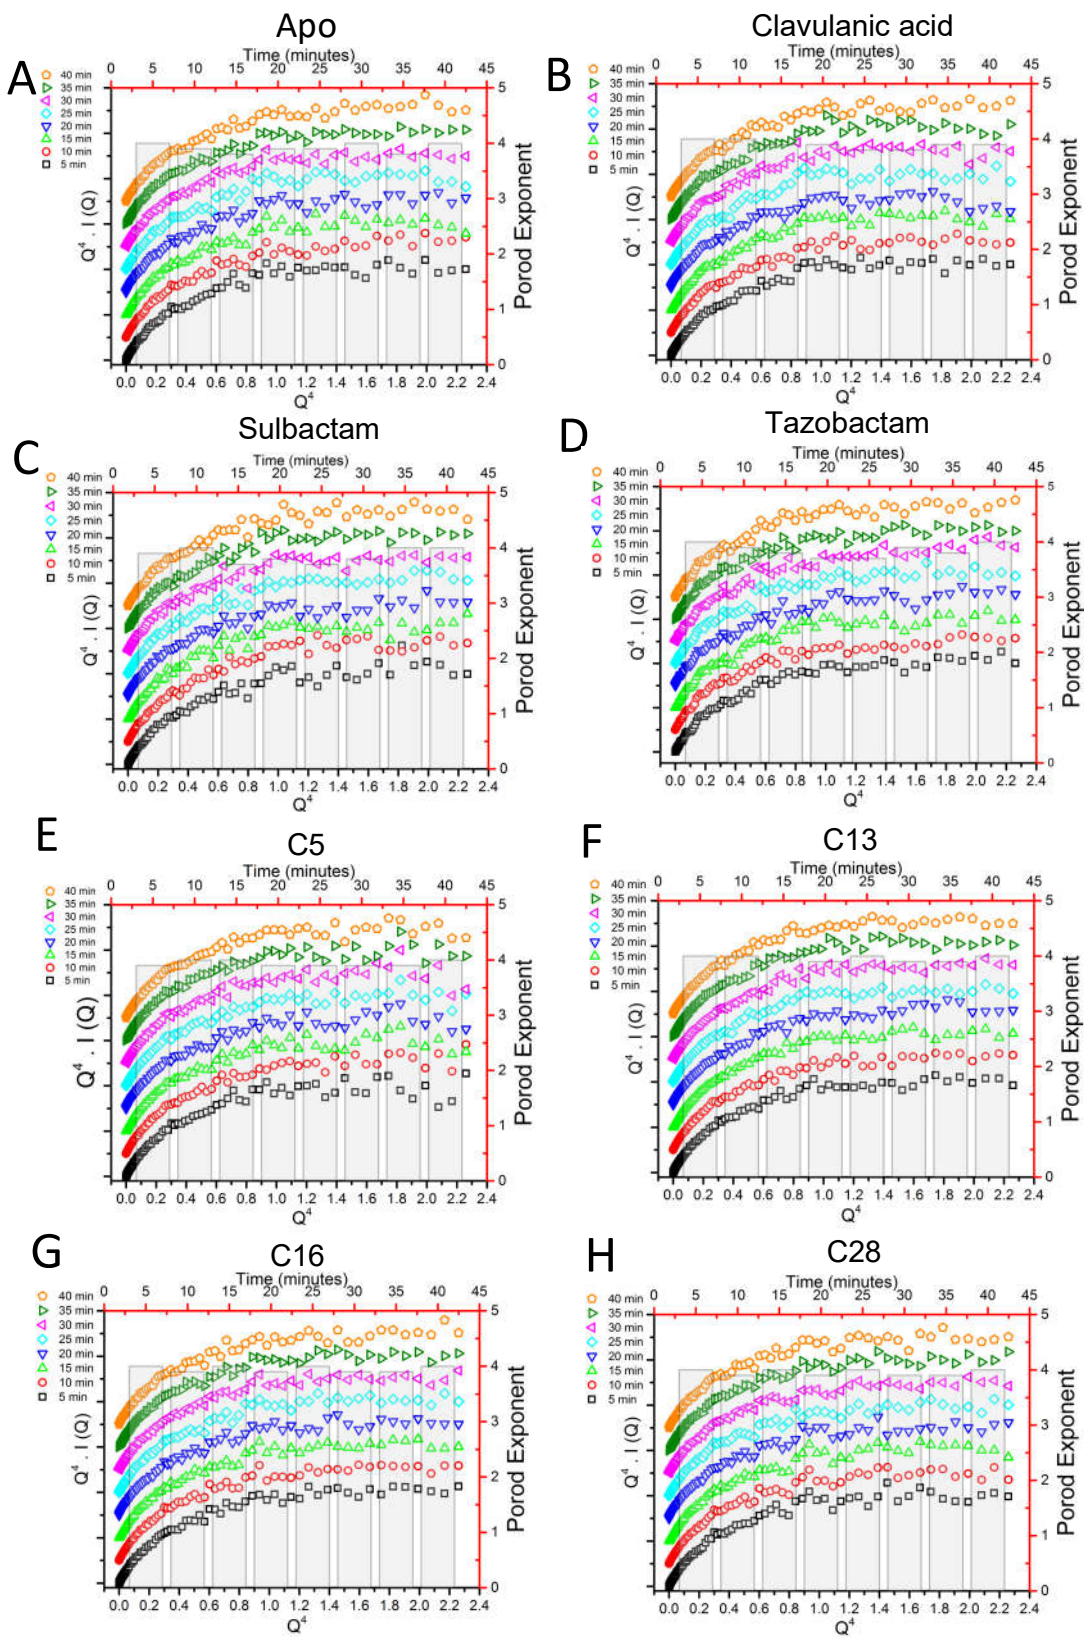



Supplementary figure S4

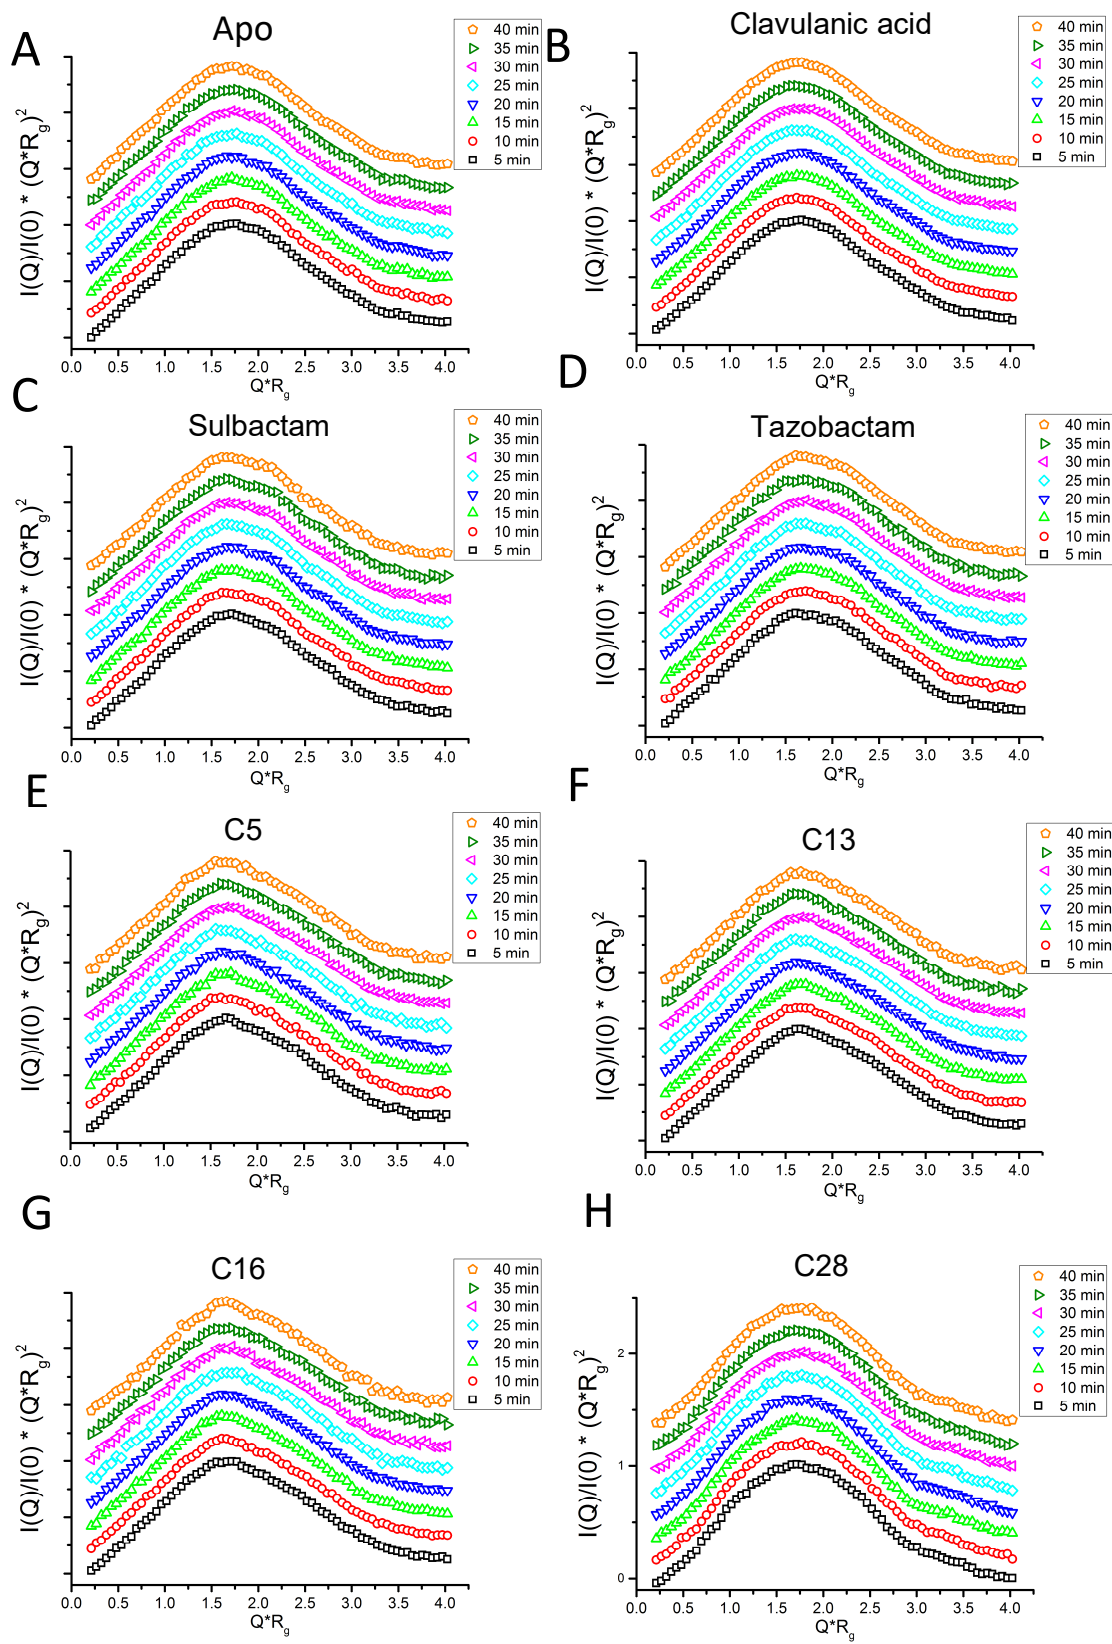

Supplement: 41598_2017_6023_MOESM1_ESM.pdf [file 41598_2017_6023_MOESM1_ESM.pdf]
